# Supplementary material for: TiO2–SiO2 Janus particles with highly enhanced photocatalytic activity
Source: Royal Society of Chemistry journal article supplement (doi:10.1039/c6ra12378c), 2016-01-01
Supplement: c6ra12378c1.pdf [file c6ra12378c1.pdf]

## Supporting Information

### TiO<sub>2</sub>-SiO<sub>2</sub> Janus Particles with highly enhanced photocatalytic activity

Kamlesh Panwar, Manjeet Jassal\*, Ashwini K. Agrawal\*

SMITA Research Lab, Indian Institute of Technology,

Hauz Khas, New Delhi 110016, India

\*Corresponding Author. Tel.: +91 11 2659 1426; E-mail: ashwini@smita-iitd.com, manjeetjassal@gmail.com.

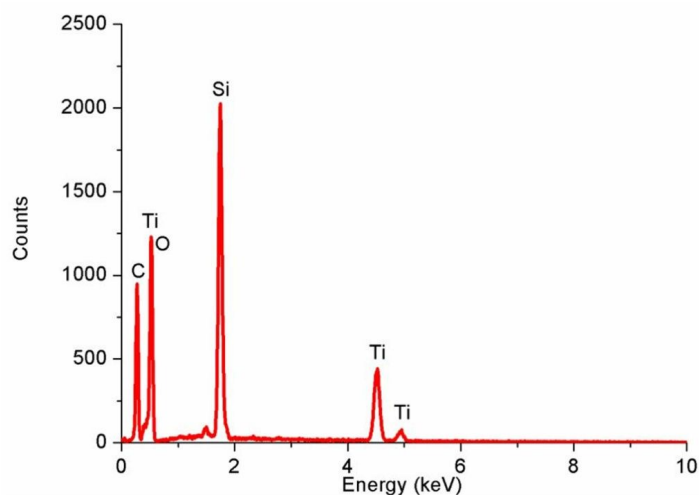

Figure S1. EDX analysis of SiO<sub>2</sub>-TiO<sub>2</sub> core-shell particles.

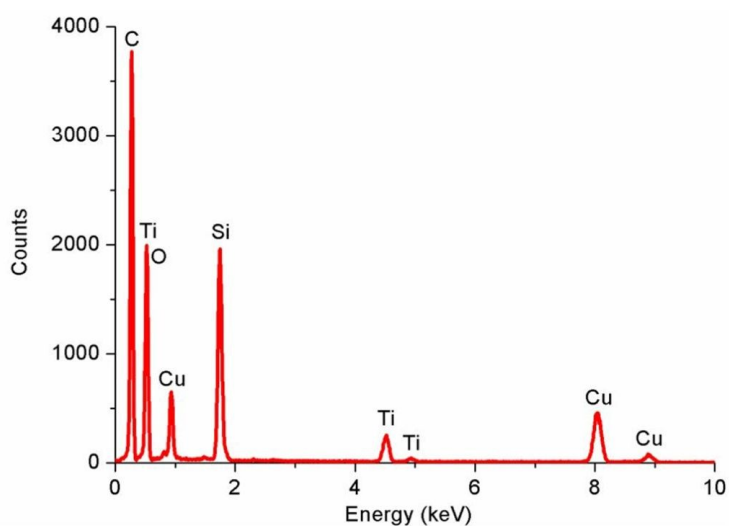

Figure S2. EDX analysis of TiO<sub>2</sub>-SiO<sub>2</sub> Janus particles.

| Samples              | t=0 h                                                                             | t=1 h                                                                             | t=2 h                                                                             | t=4.5 h                                                                             |
|----------------------|-----------------------------------------------------------------------------------|-----------------------------------------------------------------------------------|-----------------------------------------------------------------------------------|-------------------------------------------------------------------------------------|
| Control<br>SG dye    | 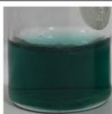 |  |  |  |
| P25 TiO <sub>2</sub> |  |  |  |  |
| ST-<br>CS@450        |  |  |  |  |
| Janus@<br>450        |  |  |  |  |
| Janus@<br>750        |  |  |  |  |

**Figure S3.** Images of Solophenyl green dye solutions containing different TiO<sub>2</sub> nanoparticles with varying duration of UV exposure.

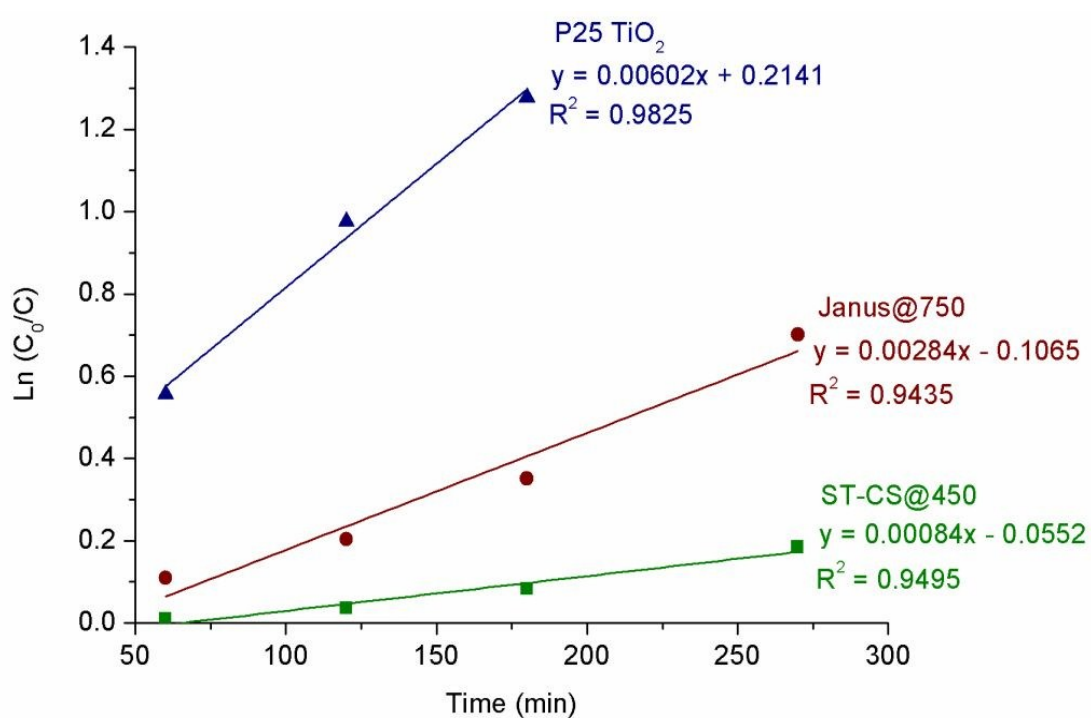

**Figure S4.** The kinetic curves for degradation of Solophenyl green dye using P25 TiO<sub>2</sub>, ST-CS@450 and Janus@750 at the TiO<sub>2</sub> concentration of 50 mg/L.

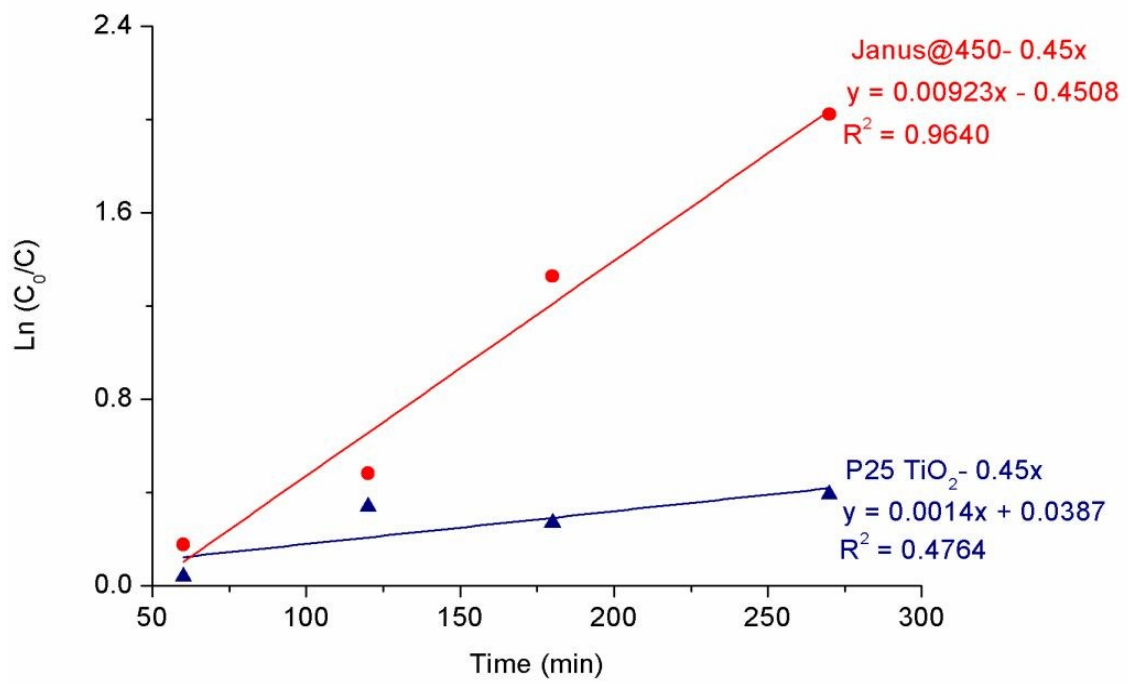

**Figure S5.** The kinetic curves for degradation of Solophenyl green dye using P25 TiO<sub>2</sub> and Janus@450 at TiO<sub>2</sub> concentration of 22.5 mg/L (0.45 times).
